# Supplementary material for: Unravelling the Role of Synthesis Conditions on the Structure of Zinc Oxide-Reduced Graphene Oxide Nanofillers
Source: Nanomaterials (Basel). 2021 Aug 23;11(8):2149. doi: 10.3390/nano11082149 (PMC8399407; doi:10.3390/nano11082149)
Supplement: Supplementary file 1 [file nanomaterials-11-02149-s001.zip › nanomaterials-1350979-supplementary.pdf]

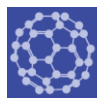

## Supplementary Materials

# Unravelling the Role of Synthesis Conditions on the Structure of Zinc Oxide-Reduced Graphene Oxide Nanofillers

Zélia Alves <sup>1,2</sup>, Cláudia Nunes <sup>1,\*</sup> and Paula Ferreira <sup>2,\*</sup>

<sup>1</sup> Department of Chemistry, CICECO-Aveiro Institute of Materials, University of Aveiro, 3810-193 Aveiro, Portugal; zeliaralves@ua.pt

<sup>2</sup> Department of Materials and Ceramic Engineering, CICECO-Aveiro Institute of Materials, University of Aveiro, 3810-193 Aveiro, Portugal

\* Correspondence: claudianunes@ua.pt (C.N.); pcferreira@ua.pt (P.F.)

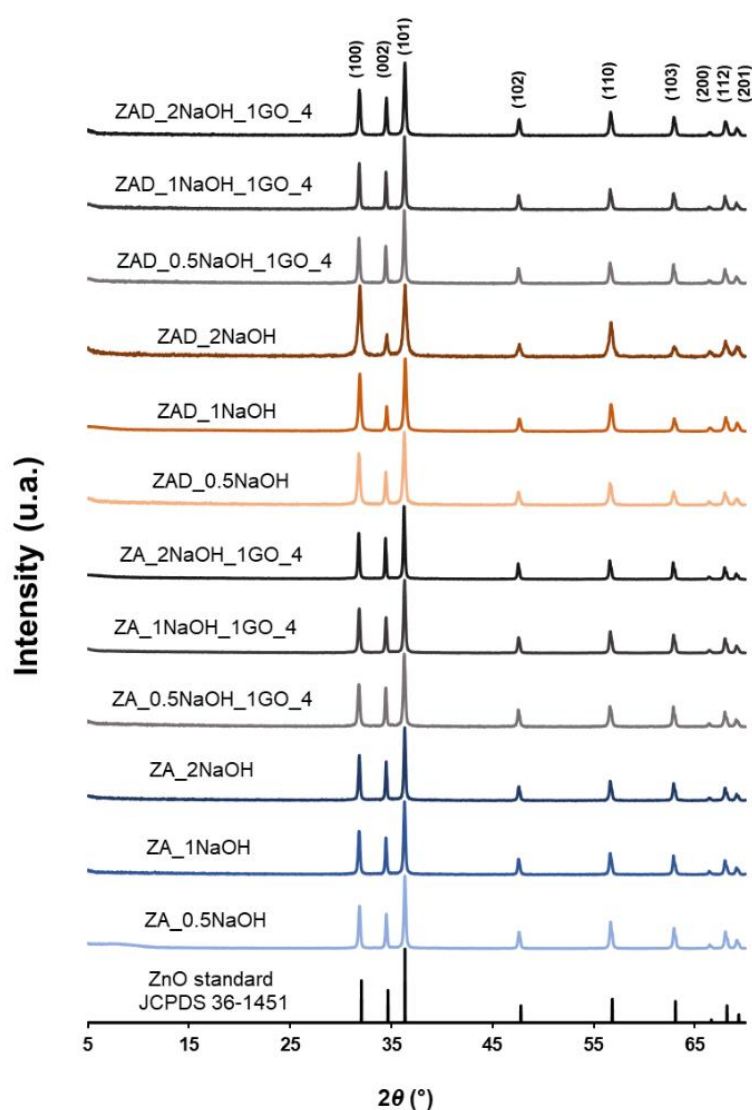

**Figure S1.** XRD diffractograms of a) ZnO and ZnO-rGO composites varying the NaOH concentration (0.5, 1, and 2 M) and the zinc precursor (ZA and ZAD).

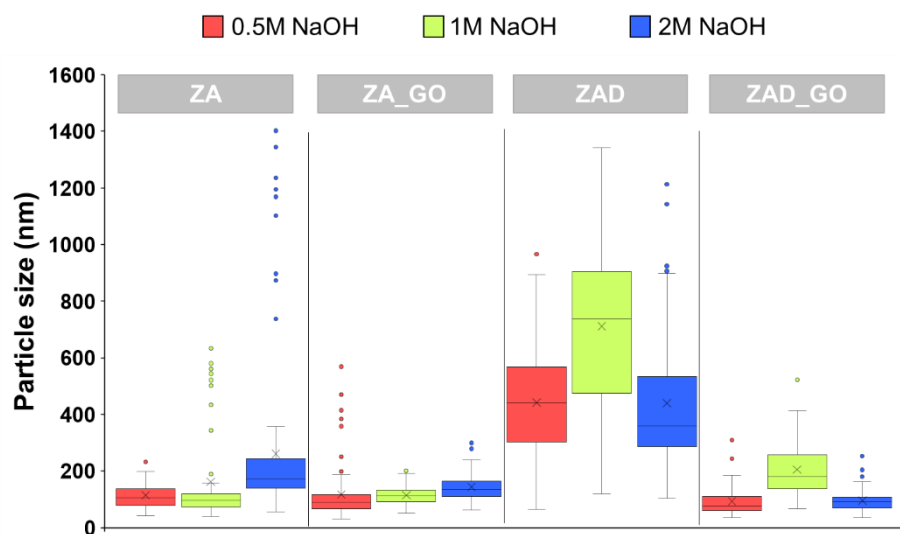

**Figure S2.** Boxplot representing the variation of ZnO particles size as a function of NaOH concentration (0.5 M, 1.0 M, and 2.0 M), for the two zinc acetate precursors in the presence or not of graphene oxide. (ZA – Zinc Acetate, ZA\_GO – Zinc Acetate with the addition of graphene oxide, ZAD – Zinc Acetate Dihydrate, ZAD\_GO – Zinc acetate dihydrate with the addition of graphene oxide).

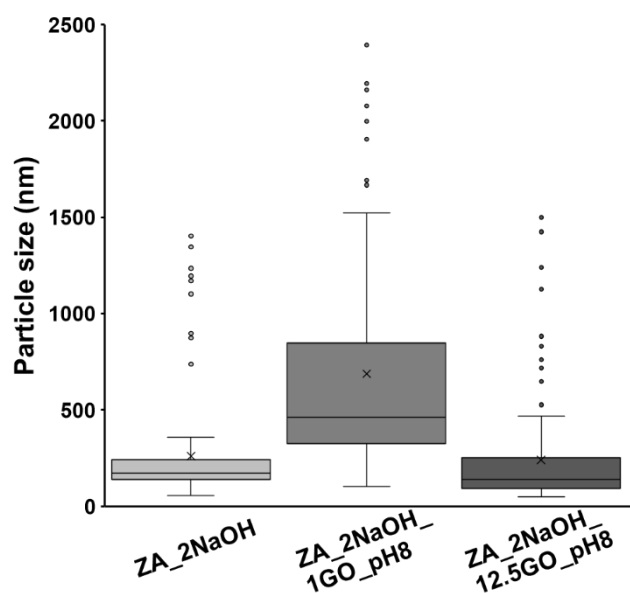

**Figure S3.** Particle size of ZnO and ZnO-rGO structures varying the concentration of GO solution: ZA\_2NaOH, ZA\_2NaOH\_1GO\_8, and ZA\_2NaOH\_12.5GO\_8.

**Table S1.** Raman data of ZA\_2MNaOH, ZA\_2MNaOH\_1GO\_pH8, and ZA\_2MNaOH\_12.5GO\_pH8 samples related with the modes of ZnO and rGO.

|                   | $E_2^H$ | $E_2^H/A_1^{LO}$ | FWHM |    | $I_D/I_G$ |
|-------------------|---------|------------------|------|----|-----------|
|                   | FWHM    |                  | D    | G  |           |
| ZA_2NaOH          | 15.322  | 2.174            | -    | -  | -         |
| ZA_2NaOH_1GO_8    | 22.975  | 0.493            | 167  | 69 | 0.89      |
| ZA_2NaOH_12.5GO_8 | 23.027  | 0.525            | 165  | 88 | 1.36      |
